# Supplementary material for: Myeloid-derived suppressor cell development is regulated by a STAT/IRF-8 axis
Source: JCI journal article supplement (doi:10.1172/jci68189), 2013-09-15
Supplement: sd1 [file 1]

## **Supplemental Data**

Development of CD11b-IRF8 transgenic and MTAG double transgenic mice The CMV-IRF8 transgenic mouse was previously developed by cloning complementary DNA, containing the IRF-8 coding sequence, into pcDNA3.1+ under control of the CMV promoter (24). To produce the CD11b-IRF8 transgenic mouse, we replaced the CMV promoter and transcription initiation region with the murine CD11b promoter and accompanying transcription initiation region. Using the genomic DNA purified from normal mouse cells, the mouse CD11b promoter (-2000 to -1), including the 5'-untranslated region was amplified by PCR. Following subcloning, the resultant 4.3 kb fragment, which contained the functional transcriptional unit (i.e., promoter, gene, poly A sites) was purified and then microinjected into the pronuclei of one cell embryos of fertilized eggs from B6 mice to obtain several founder mice. Transgene integration in progeny was verified by Southern blot analysis using the 4.3 kb fragment as the probe and PCR genotyping of tail snips.

Progeny for experimental studies were produced by mating IRF-8-Tg male mice with either wild-type female B6 or BALB/c mice. The founder lines, 370 and 371, were selected for this study based on the highest IRF-8 copy number and mRNA levels and in initial experiments both behaved similarly in their ability to attenuate MDSC effects. No atypical effects of IRF-8 transgene expression were observed on diverse hematologic parameters, including phenotypic analysis of the spleen, complete blood count (CBC) on peripheral whole blood and morphologic analyses of the bone marrow (see Supplemental Figure 2 and Table IV). To develop double-Tg mice expressing transgenes for both MTAG and IRF-8, male MTAG mice were bred with female CD11b-IRF8 Tg mice. To ensure that the transgenes for both IRF-8 and spontaneous mammary

carcinoma development (i.e., MMTV-PyMT) were expressed, PCR analysis for IRF-8 and MTAG expression of tail snip DNA was conducted using the conditions mentioned in the PCR/RT-PCR section below. For simplicity, single-Tg refers to MTAG mice, whereas double-Tg refers to MTAG/CD11b-IRF8 Tg mice.

Molecular analyses. RNA was isolated using RNeasy Mini kits (Qiagen; Valencia, CA). cDNA was synthesized using the iScript cDNA synthesis kit (Bio-Rad, Hercules, CA). The cDNA was then used for RT-PCR and qPCR analysis. RT-PCR was conducted on a PTC-200 thermal cycler (MJ Research, Waltham, MA) under the following standard conditions: 94°C for 2 min, 30 cycles (94°C for 30 sec, 60°C for 30 sec and 72°C for 1 min) and 72°C for 10 min. The following mouse primer sets were used: GAPDH forward: 5'-CATCACCATCTTCC AGGAGCG-3' and reverse: 5'-ACGGACACATTGGGGGTAGG -3', IRF-8 forward: 5'-CGTGG AAGACGAGGTTACGCTG-3'; reverse: 5'-GCTGAATGGTGTGTGTCATAGGC-3'; C/EBP $\beta$  forward: 5'-AGCCCCTACCTGGAGCCGCTCGCG-3' and reverse: 5'-GCGCAGGGCGAACGGGAAACCG-3'. All qPCR reactions were conducted on an ABI PRISM 7900HT Sequence Detection System (Applied Biosciences, Carlsbad, CA) using RT<sup>2</sup> SYBR Green mastermix (Qiagen, Valencia, CA). The following primer sets were used for qPCR: IRF-8 forward 5'-TGGAAGCATCCACCTCCTGATTGT-3' and reverse 5'-TGATCGAACAGATCG ACAGCAGCA-3'; GAPDH as previously indicated.

For genotyping, genomic DNA was extracted from tail tissue using DirectPCR tail digestion (Viagen, Los Angeles, CA). MTAG transgene expression was determined using the forward: 5'-AGTCACTGCTACTGCACCCAG-3' and reverse: 5'-CTCTCCTCAGTTCCTCGC

TCC-3' primer set. For IRF-8<sup>-/-</sup> mice, genotyping was determined using the following primers: 5'-CATGGCACTGGTCCAGATGTCTTCC-3', 5'-CTTCCAGGGATACGGAACATG GTC-3' and 5'-CGAAGGAGCAAAGCTGCTATTGGCC. PCR products were separated on a 1% agarose gel and the images captured with the Chemidoc Imaging System (BioRad).

For the ChIP studies, STAT3 occupation of the IRF-8 promoter was determined using the following primer set (-1398 to -1223); forward 5'-ACTGGGTGGACATTTGGGATCTGT-3' and reverse 5'-AAGTGTTTGCTGTGAAGGGCAGAG-3'. STAT5 occupation of the IRF-8 promoter was analyzed using the following primer set (-677 to -372): forward 5'-CTGCAACGAAAGTCCCTCTC-3' and reverse 5'-CTGAGTGTCAGCTGCTCAGG-3'.

Microarray analysis. Total RNA of flow-purified CD11b<sup>+</sup> Gr-1<sup>+</sup> cells from naïve B6, IRF-8<sup>-/-</sup> or AT-3 tumor-bearing mice (~1500 mm<sup>3</sup>) was extracted and quantified using a ND-1000 spectrophotometer (NanoDrop, Thermo Scientific). Quality control and direct hybridization to the MouseWG-6 whole-genome gene expression array was conducted and analyzed, as described.<sup>30</sup> All data is MIAME compliant.

## Supplemental Figures

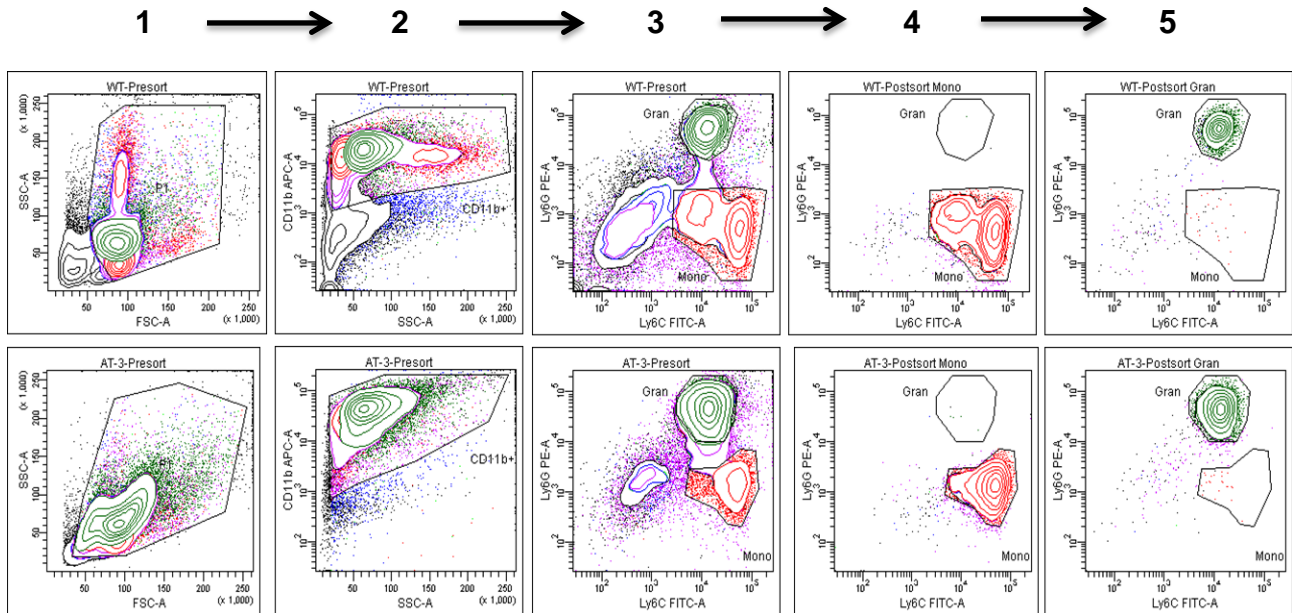

Supplemental Figure 1. Gating strategy for purification of the different MDSC subsets

*Upper*, non-tumor-bearing control mice; *lower*, AT-3 tumor-bearing mice. Splenocytes from the indicated groups of mice were collected and enriched for CD11b<sup>+</sup> cells using magnetic bead separation methods. Cells from each group were then triple-stained for CD11b (APC), Ly6C (FITC) and Ly6G (PE) expression prior to flow sorting. Next, 1) live cell gate was established; 2) live cells were gated on the CD11b<sup>+</sup> fraction; 3) gated CD11b<sup>+</sup> fraction was plotted in relation to Ly6C and Ly6G expression to identify the two non-overlapping subsets prior to sorting; 4) post-sort collection of the CD11b<sup>+</sup>Ly6G<sup>+</sup>Ly6C<sup>+</sup> monocytic fraction; and 5) post-sort collection of the CD11b<sup>+</sup>Ly6G<sup>+</sup>Ly6C<sup>lo</sup> granulocytic fraction. In all cases, cell purity was > 97% for the intended subset with < 0.3% contamination of the opposing subset.

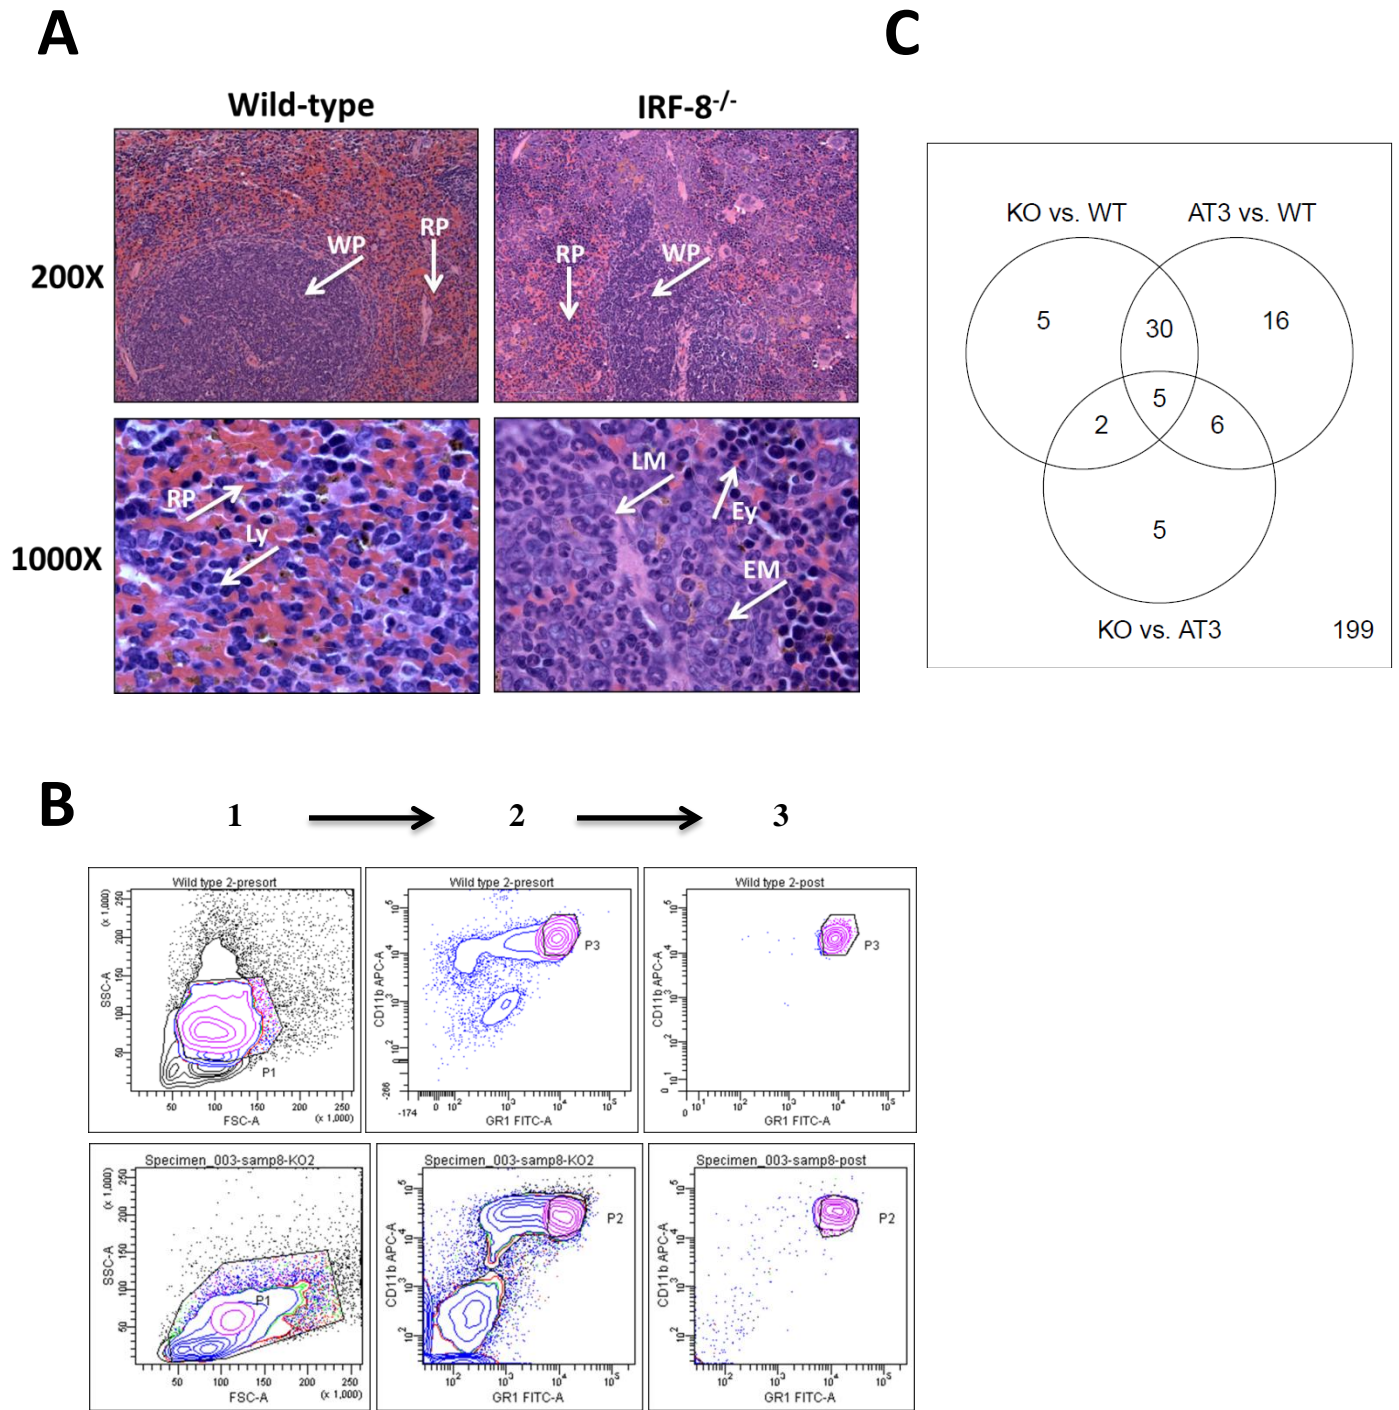

*Supplemental Figure 2. IRF-8-deficiency results in the accumulation of MDSC-like cells.*

(A) H&E staining of spleens of IRF-8<sup>-/-</sup> (age=194 days) and WT (age=174 days) mice. One of

two mice for each genotype is shown. Splens of IRF-8<sup>-/-</sup> mice reveals increased extra-medullary hematopoiesis (EMT) compared to WT mice. Arrows indicate areas of white pulp (WP), red pulp (RP), lymphocytes (Ly), erythroid (Ey) or early (EM) or late (LM) myeloid populations (megakaryocytes, not shown in this image). (B) Gating strategy for the isolation of the CD11b<sup>+</sup>Gr-1<sup>hi</sup> fraction from splens of WT or IRF-8<sup>-/-</sup> mice. To do so, 1) live cell gate was established on CD11b-pre-enriched fraction; 2) cells were analyzed for and gated on the CD11b<sup>+</sup>Gr-1<sup>hi</sup> fraction prior to sorting; and 3) post-sort collection of the CD11b<sup>+</sup>Gr-1<sup>hi</sup> granulocytic fraction. Cell purities were similar to those of Supplemental Figure 1. Post-sort reveals recovery of phenotypically similar cell populations between both groups. (C) Venn diagram of significantly enriched pathways among the three groups of comparisons.

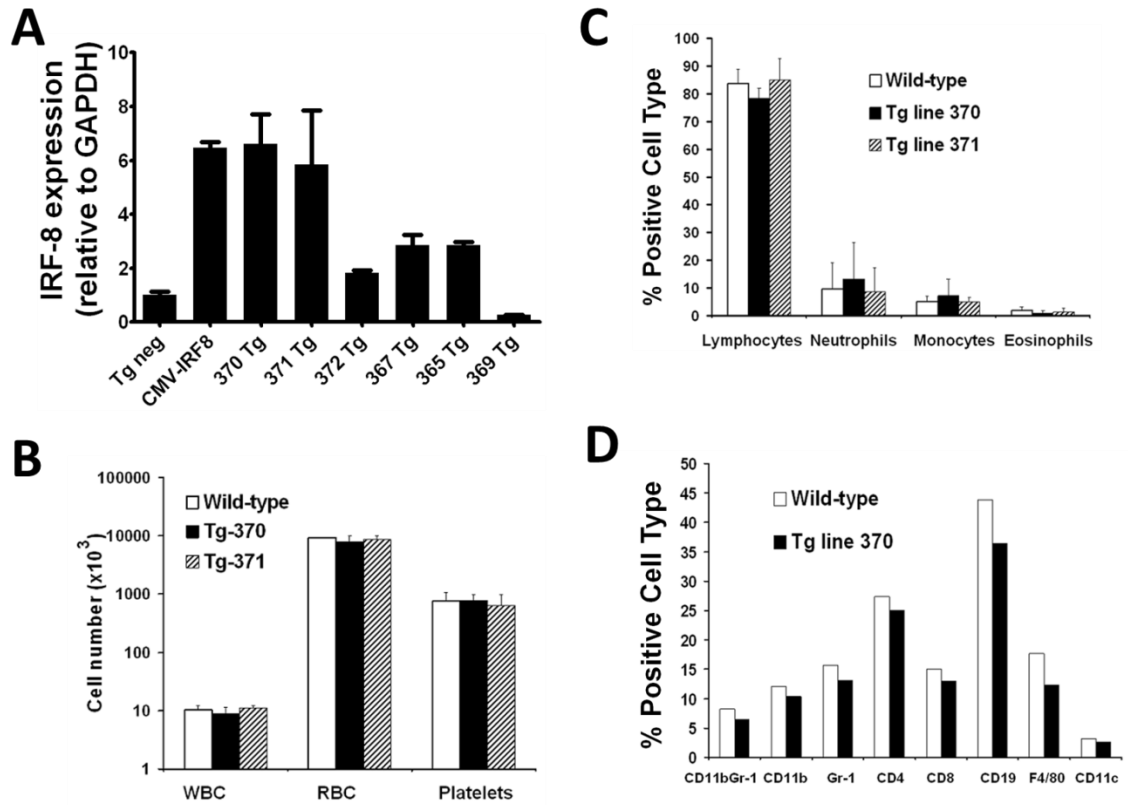

Supplemental Figure 3. Characteristics of the IRF-8 transgenic mouse model. (A) IRF-8 mRNA levels were quantified by qPCR using purified CD11b<sup>+</sup>Gr-1<sup>+</sup> cells (8 – 10 weeks of age). Data reflect fold-change in IRF-8 levels relative to matched WT mice (first bar), and are expressed as the mean  $\pm$  SEM of three values. (B) Percentages of cell types in whole blood smear analysis. (C) CBC analysis; cell number ( $\times 10^3$ ) graphed in log scale per  $\mu$ l of sample. (D) Leukocyte analysis by flow cytometry. Data in A-C represent the mean  $\pm$  SEM of age- and gender (male)-matched WT and IRF-8-Tg mice (n = 5 mice/group).

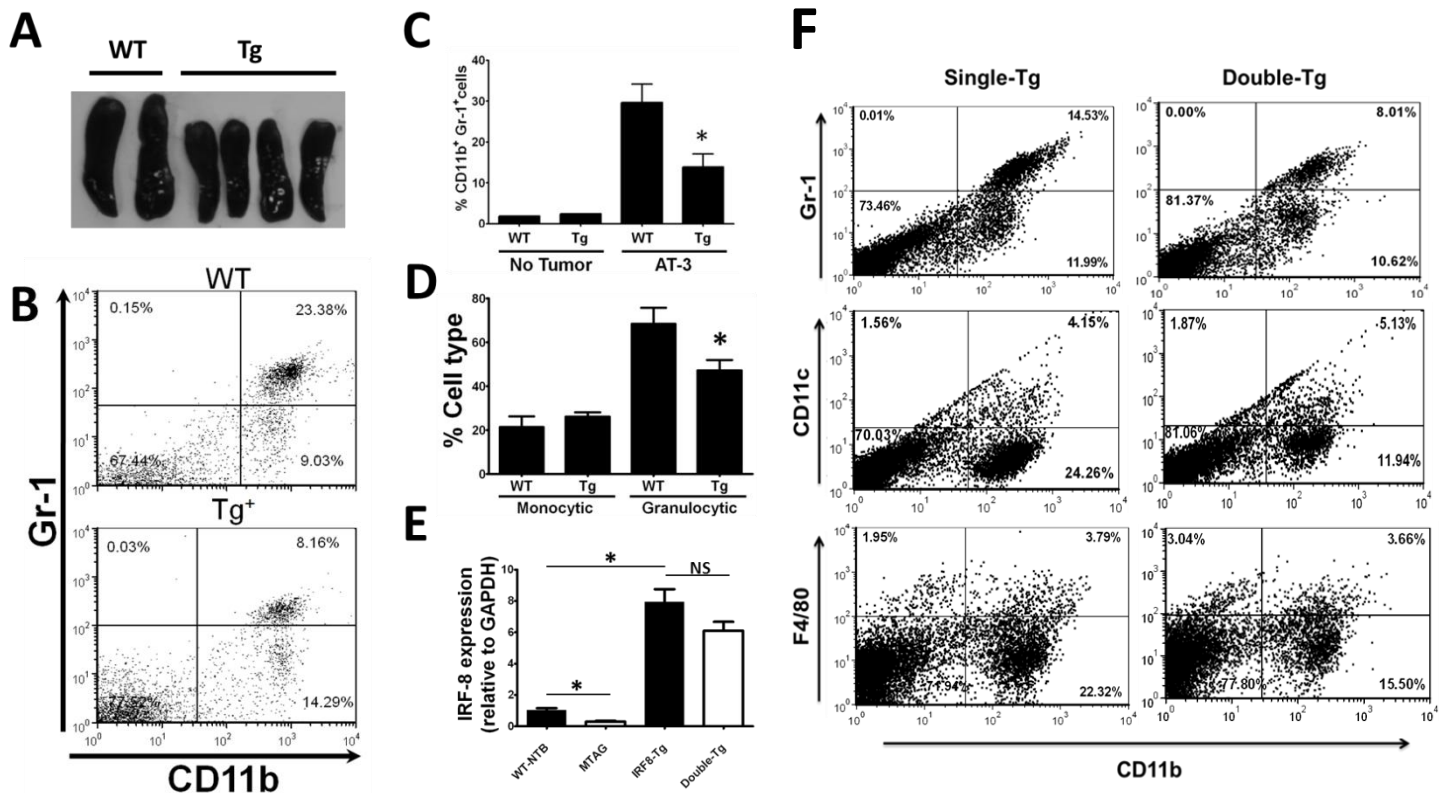

Supplemental Figure 4. IRF-8 gain-of-function reduces MDSC subset generation. (A)

Spleens from representative AT-3 tumor-bearing WT or IRF-8-Tg mice (avg. tumor volume ~1500 mm<sup>3</sup>). (B) Flow plot of representative splenocytes of mice in A for the percentage of CD11b<sup>+</sup>Gr-1<sup>+</sup> cells. (C) Data in B quantified (n=4 mice each, \**P* < 0.03). (D) Data in C quantified for the percentages of monocytic or granulocytic subsets based on differential expression of Ly6C and Ly6G on the gated CD11b<sup>+</sup> fraction (\**P* < 0.05). (E) IRF-8 expression levels of splenic CD11b<sup>+</sup>Gr-1<sup>+</sup> cells from the indicated groups. The results are presented as fold-change relative to the first column set at 1 (i.e., WT non-tumor-bearing control) (n=3 mice each, \**P* < 0.01; NS=not significant). Data in C-E are presented as mean ± SEM of the indicated number of mice. (F) Representative density plots for the data quantified in Figure 7.



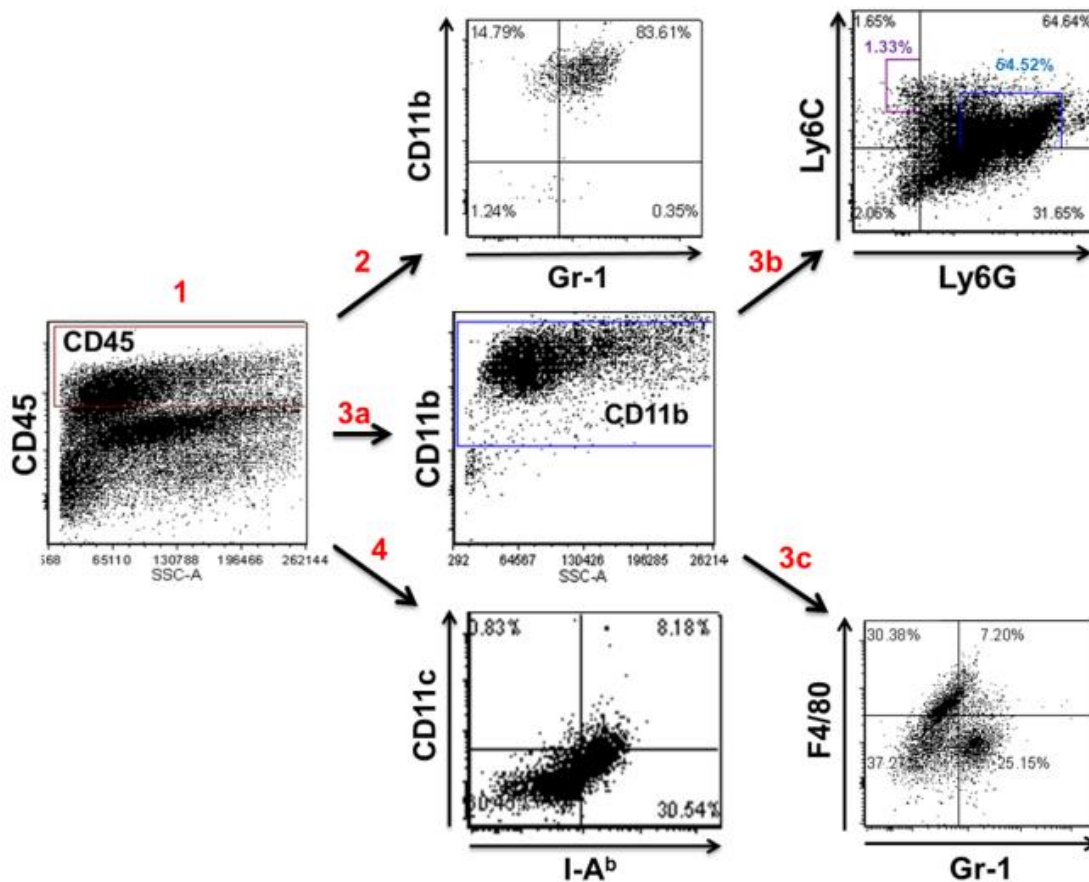

*Supplemental Figure 5. Gating strategy for analyses of the different tumor-infiltrating myeloid populations.* Analyses are based on the following approach: 1) total live cells were gated on the CD45<sup>+</sup> leukocyte fraction; 2) the gated CD45<sup>+</sup> fraction was then plotted in relation to CD11b and Gr-1 to identify total MDSCs (upper right); 3a) total CD11b<sup>+</sup> cells were identified within the gated CD45<sup>+</sup> fraction; 3b) the gated CD11b<sup>+</sup> fraction was then plotted in relation to Ly6C and Ly6G to identify the MDSC subsets. The purple and blue gates spotlight the fractions analyzed, which represent the vast majority of cells within the respective quadrant; 3c) the gated CD11b<sup>+</sup> fraction was also plotted in relation to F4/80 and Gr-1 to identify the macrophages (upper left); or 4) the gated CD45<sup>+</sup> fraction was plotted in relation to CD11c and I-A<sup>b</sup> (a major MHC class II molecule) to identify total DCs (upper right). Data are from a tumor-bearing WT mouse, although the same gating strategy was used for all tumor-bearing WT and Tg mice.

## A. KG1a

FLLL32 (uM): 0.0 0.1 0.5 1.0 1.5 2.0 5.0 10

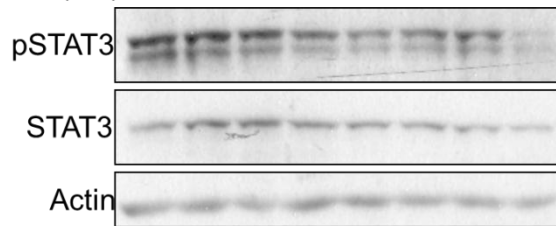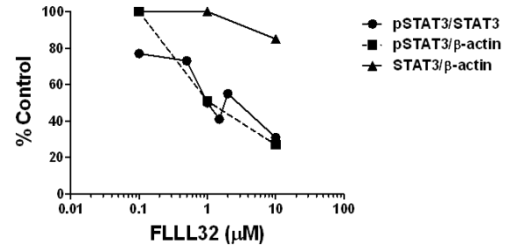

## B. K562

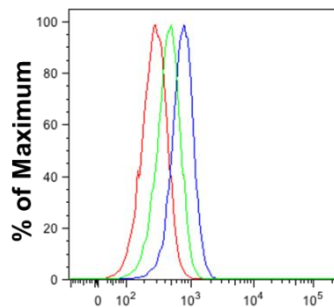

## C. THP-1

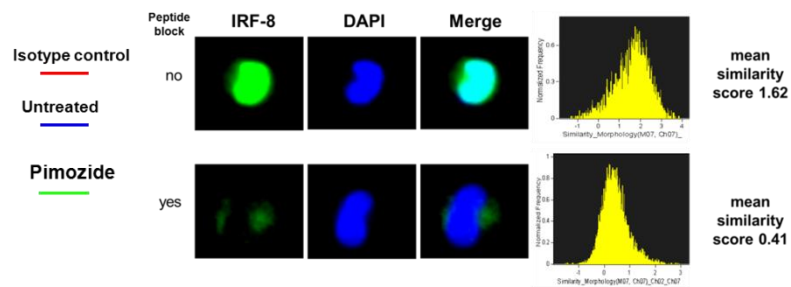

Supplemental Figure 6. Cell line models were used as positive controls for STAT3, STAT5 and IRF-8 analyses. (A) FLLL32 inhibits STAT3 phosphorylation in KG1a cells in a dose-dependent manner. KG1a cells were treated with the indicated concentrations of FLLL32 for 7 hours. Afterwards, STAT3 phosphorylation (phospho-STAT3 (Y705); Cell Signaling), as well as total STAT3 (Santa Cruz), and β-actin (Sigma) levels were measured by Western blot analysis (*left*) and densitometry (*right*). (B) Pimozide inhibits STAT5 phosphorylation in K562 cells, as measured by phospho-specific flow cytometry (Cell Signaling). K562 cells were treated with 10 μM pimozide (solid line, unfilled histogram), 1 μM imatinib (dashed line) or vehicle control (gray-filled histogram) for 3 hours. (C) IRF-8 expression by flow cytometry in IRF-8-expressing THP-1 cells. Intracellular IRF-8 staining of THP-1 cells was analyzed by Image Stream. Green represents IRF-8 staining; blue represents DAPI and teal represents the merge. Data illustrated as a similarity score. Random selected images of THP-1 cells showing IRF-8 localization, without (top) and with (bottom) peptide block.

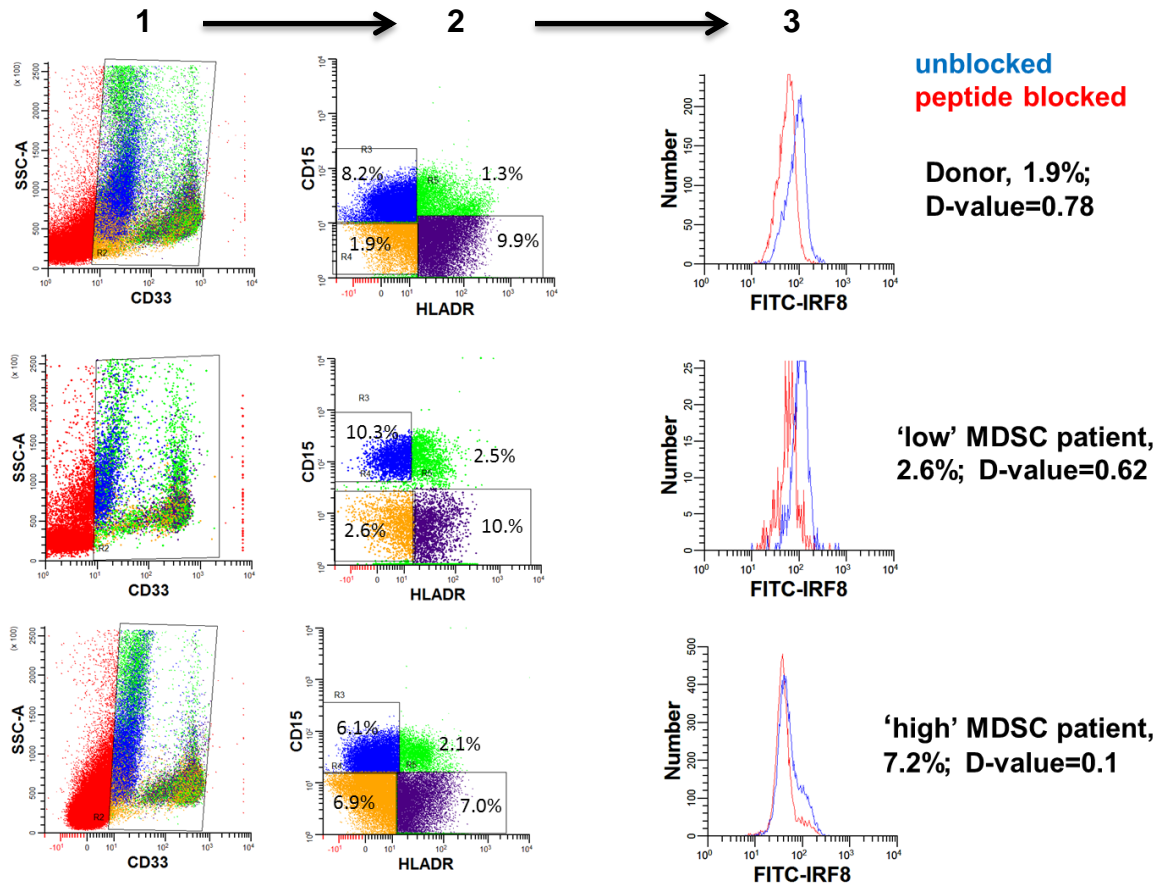

Supplemental Figure 7. Gating strategy for the analysis of IRF-8 expression in the CD33<sup>+</sup>CD15<sup>-</sup>HLA-DR<sup>-</sup> MDSC subset Buffy coat leukocytes from representative subjects (healthy donor or patients with low or high MDSC levels, as defined in Figure 10) were stained for expression of CD33, CD15, HLA-DR and IRF-8. Next, 1) live cells were gated on the CD33<sup>+</sup> fraction; 2) CD33<sup>+</sup> cells from each group were plotted in relation to CD15 and HLA-DR expression to identify the CD33<sup>+</sup>CD15<sup>-</sup>HLA-DR<sup>-</sup> fraction (in the lower left quadrant); and 3) the gated CD33<sup>+</sup>CD15<sup>-</sup>HLA-DR<sup>-</sup> fraction was then analyzed for IRF-8 expression. To do so, during the primary antibody incubation step, duplicate samples were prepared and incubated with or without an IRF-8 Ab blocking peptide to improve accuracy for IRF-8 quantification. Specific IRF-8 levels were then quantified using KS statistics and the data reported as the D-value as described in detail in the Methods.

Table I. Gene Set Enrichment Analysis: IRF-8<sup>-/-</sup> vs. Wild-type Controls <sup>a</sup>

| <u>GENE SET</u>                                  | <u>#GENES</u> | <u>FDR.q.val<sup>b</sup></u> |
|--------------------------------------------------|---------------|------------------------------|
| MORI_IMMATURE_B_LYMPHOCYTE_DN                    | 40            | 0                            |
| MORI_LARGE_PRE_BII_LYMPHOCYTE_UP                 | 43            | 0                            |
| MARKEY_RB1_ACUTE_LOF_DN                          | 144           | 0                            |
| HOFFMANN_LARGE_TO_SMALL_PRE_BII_LYMPHOCYTE_UP    | 69            | 0                            |
| YU_MYC_TARGETS_UP                                | 29            | 0                            |
| BERENJENO_TRANSFORMED_BY_RHOA_UP                 | 334           | 0                            |
| PAL_PRMT5_TARGETS_UP                             | 116           | 0                            |
| LIAN_LIPA_TARGETS_6M                             | 53            | 0                            |
| LIAN_LIPA_TARGETS_3M                             | 47            | 0                            |
| ICHIBA_GRAFT_VERSUS_HOST_DISEASE_D7_UP           | 79            | 0                            |
| MARKEY_RB1_ACUTE_LOF_UP                          | 171           | 0                            |
| HESS_TARGETS_OF_HOXA9_AND_MEIS1_DN               | 69            | 0                            |
| MARKEY_RB1_CHRONIC_LOF_DN                        | 71            | 0                            |
| ZHANG_BREAST_CANCER_PROGENITORS_UP               | 229           | 0.00011                      |
| LE_EGR2_TARGETS_UP                               | 62            | 0.000124                     |
| YAO_TEMPORAL_RESPONSE_TO_PROGESTERONE_CLUSTER_13 | 136           | 0.000496                     |
| RIZ_ERYTHROID_DIFFERENTIATION                    | 50            | 0.000632                     |
| FOSTER_INFLAMMATORY_RESPONSE_LPS_DN              | 235           | 0.000865                     |
| GOLDRATH_ANTIGEN_RESPONSE                        | 249           | 0.001154                     |
| SEKI_INFLAMMATORY_RESPONSE_LPS_UP                | 46            | 0.001165                     |
| MORI_EMU_MYC_LYMPHOMA_BY_ONSET_TIME_UP           | 76            | 0.001523                     |
| IVANOVA_HEMATOPOIESIS_EARLY_PROGENITOR           | 73            | 0.001818                     |
| STARK_PREFRONTAL_CORTEX_22Q11_DELETION_DN        | 355           | 0.002661                     |
| MARKEY_RB1_CHRONIC_LOF_UP                        | 53            | 0.002706                     |
| VARELA_ZMPSTE24_TARGETS_UP                       | 24            | 0.002838                     |
| OUELLET_OVARIAN_CANCER_INVASIVE_VS_LMP_UP        | 68            | 0.003657                     |
| MORI_MATURE_B_LYMPHOCYTE_DN                      | 41            | 0.005326                     |
| MORI_MATURE_B_LYMPHOCYTE_UP                      | 62            | 0.007333                     |
| BOYLAN_MULTIPLE_MYELOMA_PCA1_UP                  | 55            | 0.013204                     |
| COATES_MACROPHAGE_M1_VS_M2_UP                    | 42            | 0.013265                     |
| MORI_PRE_BI_LYMPHOCYTE_DN                        | 54            | 0.013494                     |
| MORI_LARGE_PRE_BII_LYMPHOCYTE_DN                 | 43            | 0.016997                     |
| BREDEMEYER_RAG_SIGNALING_NOT_VIA_ATM_UP          | 35            | 0.017263                     |
| MORI_IMMATURE_B_LYMPHOCYTE_UP                    | 38            | 0.017823                     |
| MARTORIATI_MDM4_TARGETS_NEUROEPITHELIUM_DN       | 33            | 0.017885                     |
| ICHIBA_GRAFT_VERSUS_HOST_DISEASE_35D_UP          | 111           | 0.026818                     |
| YU_MYC_TARGETS_DN                                | 45            | 0.02719                      |
| HOFFMANN_IMMATURE_TO_MATURE_B_LYMPHOCYTE_UP      | 19            | 0.027731                     |
| YAO_TEMPORAL_RESPONSE_TO_PROGESTERONE_CLUSTER_5  | 19            | 0.028404                     |
| YAO_HOXA10_TARGETS_VIA_PROGESTERONE_UP           | 37            | 0.031785                     |
| YAO_TEMPORAL_RESPONSE_TO_PROGESTERONE_CLUSTER_14 | 97            | 0.032518                     |
| MCBRYAN_PUBERTAL_BREAST_4_5WK_UP                 | 100           | 0.036288                     |

<sup>a</sup> Refer to Figure 3 for experimental details; <sup>b</sup> FDR, false discovery rate

Table II Gene Set Enrichment Analysis: Tumor-Bearers vs. Wild-type Controls

| <u>GENE SET</u>                                  | <u>#GENES</u> | <u>FDR.q.val</u> |
|--------------------------------------------------|---------------|------------------|
| MORI_IMMATURE_B_LYMPHOCYTE_DN                    | 40            | 0                |
| HOFFMANN_LARGE_TO_SMALL_PRE_BII_LYMPHOCYTE_UP    | 69            | 0                |
| MARKEY_RB1_ACUTE_LOF_DN                          | 144           | 0                |
| PAL_PRMT5_TARGETS_UP                             | 116           | 0                |
| YU_MYC_TARGETS_UP                                | 29            | 0                |
| MORI_LARGE_PRE_BII_LYMPHOCYTE_UP                 | 43            | 0                |
| YAO_TEMPORAL_RESPONSE_TO_PROGESTERONE_CLUSTER_13 | 136           | 0                |
| BERENJENO_TRANSFORMED_BY_RHOA_UP                 | 334           | 0                |
| STARK_PREFRONTAL_CORTEX_22Q11_DELETION_DN        | 355           | 0                |
| YAO_TEMPORAL_RESPONSE_TO_PROGESTERONE_CLUSTER_17 | 126           | 0                |
| GOLDRATH_ANTIGEN_RESPONSE                        | 249           | 0                |
| IVANOVA_HEMATOPOIESIS_EARLY_PROGENITOR           | 73            | 0                |
| SEKI_INFLAMMATORY_RESPONSE_LPS_UP                | 46            | 0                |
| ICHIBA_GRAFT_VERSUS_HOST_DISEASE_D7_UP           | 79            | 0                |
| MARKEY_RB1_ACUTE_LOF_UP                          | 171           | 0                |
| VARELA_ZMPSTE24_TARGETS_UP                       | 24            | 0                |
| RASHI_RESPONSE_TO_IONIZING_RADIATION_1           | 32            | 0                |
| YAO_TEMPORAL_RESPONSE_TO_PROGESTERONE_CLUSTER_14 | 97            | 6.34E-05         |
| LE_EGR2_TARGETS_UP                               | 62            | 6.82E-05         |
| OUELLET_OVARIAN_CANCER_INVASIVE_VS_LMP_UP        | 68            | 0.000131         |
| ZHANG_BREAST_CANCER_PROGENITORS_UP               | 229           | 0.000301         |
| ICHIBA_GRAFT_VERSUS_HOST_DISEASE_D7_DN           | 19            | 0.000462         |
| MORI_EMU_MYC_LYMPHOMA_BY_ONSET_TIME_UP           | 76            | 0.000496         |
| LEE_LIVER_CANCER_MYC_UP                          | 26            | 0.0006           |
| YAO_TEMPORAL_RESPONSE_TO_PROGESTERONE_CLUSTER_10 | 45            | 0.000631         |
| HESS_TARGETS_OF_HOXA9_AND_MEIS1_DN               | 69            | 0.000636         |
| IVANOVA_HEMATOPOIESIS_LATE_PROGENITOR            | 104           | 0.000759         |
| FOSTER_INFLAMMATORY_RESPONSE_LPS_DN              | 235           | 0.000986         |
| MORI_MATURE_B_LYMPHOCYTE_DN                      | 41            | 0.001182         |
| IVANOVA_HEMATOPOIESIS_INTERMEDIATE_PROGENITOR    | 26            | 0.001597         |
| YAO_TEMPORAL_RESPONSE_TO_PROGESTERONE_CLUSTER_11 | 68            | 0.002257         |
| RIZ_ERYTHROID_DIFFERENTIATION                    | 50            | 0.002443         |
| RASHI_RESPONSE_TO_IONIZING_RADIATION_2           | 86            | 0.003557         |
| LIAN_LIPA_TARGETS_6M                             | 53            | 0.00369          |
| HOFFMANN_IMMATURE_TO_MATURE_B_LYMPHOCYTE_UP      | 19            | 0.003827         |
| LIAN_LIPA_TARGETS_3M                             | 47            | 0.004306         |
| MODY_HIPPOCAMPUS_PRENATAL                        | 19            | 0.005393         |
| BREDEMEYER_RAG_SIGNALING_NOT_VIA_ATM_UP          | 35            | 0.008435         |
| MORI_PRE_BI_LYMPHOCYTE_DN                        | 54            | 0.009138         |
| MORI_MATURE_B_LYMPHOCYTE_UP                      | 62            | 0.010733         |
| BOYLAN_MULTIPLE_MYELOMA_C_D_UP                   | 64            | 0.010875         |
| MARKEY_RB1_CHRONIC_LOF_UP                        | 53            | 0.013204         |
| SWEET_LUNG_CANCER_KRAS_DN                        | 157           | 0.017183         |
| MARTORIATI_MDM4_TARGETS_NEUROEPITHELIUM_UP       | 62            | 0.017396         |
| BYSTRYKH_HEMATOPOIESIS_STEM_CELL_QTL_CIS         | 96            | 0.021923         |
| MARKEY_RB1_CHRONIC_LOF_DN                        | 71            | 0.024658         |
| YU_MYC_TARGETS_DN                                | 45            | 0.024977         |
| MORI_PLASMA_CELL_UP                              | 24            | 0.030429         |

Table II. Cont'd

|                                                       |     |          |
|-------------------------------------------------------|-----|----------|
| LEE_LIVER_CANCER_E2F1_DN                              | 23  | 0.030608 |
| LIANG_HEMATOPOIESIS_STEM_CELL_NUMBER_LARGE_VS_TINY_UP | 30  | 0.033018 |
| CADWELL_ATG16L1_TARGETS_UP                            | 35  | 0.038606 |
| YAO_TEMPORAL_RESPONSE_TO_PROGESTERONE_CLUSTER_1       | 37  | 0.040275 |
| YAO_TEMPORAL_RESPONSE_TO_PROGESTERONE_CLUSTER_5       | 19  | 0.040616 |
| KUMAR_TARGETS_OF_MLL_AF9_FUSION                       | 215 | 0.04451  |
| COATES_MACROPHAGE_M1_VS_M2_UP                         | 42  | 0.046538 |
| RIZ_ERYTHROID_DIFFERENTIATION_CCNE1                   | 26  | 0.047368 |
| BERENJENO_ROCK_SIGNALING_NOT_VIA_RHOA_DN              | 28  | 0.048474 |

Table III. Gene Set Enrichment Analysis: IRF-8<sup>-/-</sup> vs. Tumor-Bearers

| <u>GENE SET</u>                                  | <u>#GENES</u> | <u>FDR.q.val</u> |
|--------------------------------------------------|---------------|------------------|
| YAO_TEMPORAL_RESPONSE_TO_PROGESTERONE_CLUSTER_17 | 126           | 0                |
| RASHI_RESPONSE_TO_IONIZING_RADIATION_1           | 32            | 0.001824         |
| SEKI_INFLAMMATORY_RESPONSE_LPS_UP                | 46            | 0.002233         |
| LIAN_LIPA_TARGETS_6M                             | 53            | 0.006676         |
| LIAN_LIPA_TARGETS_3M                             | 47            | 0.007541         |
| RAMALHO_STEMNESS_DN                              | 50            | 0.008136         |
| YAO_TEMPORAL_RESPONSE_TO_PROGESTERONE_CLUSTER_10 | 45            | 0.008429         |
| MARKEY_RB1_CHRONIC_LOF_DN                        | 71            | 0.008893         |
| ICHIBA_GRAFT_VERSUS_HOST_DISEASE_D7_DN           | 19            | 0.009216         |
| RASHI_RESPONSE_TO_IONIZING_RADIATION_2           | 86            | 0.010399         |
| BOYLAN_MULTIPLE_MYELOMA_C_CLUSTER_DN             | 19            | 0.022165         |
| LEE_LIVER_CANCER_MYC_UP                          | 26            | 0.025036         |
| ICHIBA_GRAFT_VERSUS_HOST_DISEASE_35D_UP          | 111           | 0.026649         |
| YAO_TEMPORAL_RESPONSE_TO_PROGESTERONE_CLUSTER_9  | 45            | 0.030161         |
| MARTORIATI_MDM4_TARGETS_NEUROEPITHELIUM_DN       | 33            | 0.03433          |
| HOFFMANN_IMMATURE_TO_MATURE_B_LYMPHOCYTE_DN      | 20            | 0.035038         |
| LEE_TARGETS_OF_PTCH1_AND_SUFU_UP                 | 22            | 0.035181         |
| MORI_IMMATURE_B_LYMPHOCYTE_DN                    | 40            | 0.039157         |

Table IV. Characterization of bone marrow progenitors from CD11b-IRF8 transgenic mice \*

| Cell type                         | Wild-type mouse # |     |     | IRF-8 transgenic mouse # |     |     |
|-----------------------------------|-------------------|-----|-----|--------------------------|-----|-----|
|                                   | 1                 | 2   | 3   | 1                        | 2   | 3   |
| <b>Monocyte lineage total:</b>    | 3%                | 4%  | 5%  | 6%                       | 4%  | 3%  |
| Monoblasts                        | 0%                | 0%  | 0%  | 0%                       | 0%  | 0%  |
| Promonocytes                      | 0%                | 0%  | 0%  | 0%                       | 0%  | 0%  |
| Monocytes                         | 3%                | 4%  | 5%  | 6%                       | 4%  | 3%  |
| <b>Platelet lineage total:</b>    | 0%                | 1%  | 1%  | 0%                       | 0%  | 1%  |
| Megakaryoblasts                   | 0%                | 0%  | 0%  | 0%                       | 0%  | 0%  |
| Megakaryocytes                    | 0%                | 1%  | 1%  | 0%                       | 0%  | 1%  |
| <b>Neutrophil lineage total:</b>  | 28%               | 27% | 32% | 26%                      | 26% | 32% |
| Myeloblasts                       | 0%                | 0%  | 0%  | 0%                       | 0%  | 0%  |
| Promyelocytes                     | 3%                | 3%  | 3%  | 4%                       | 1%  | 7%  |
| Myelocytes                        | 22%               | 19% | 22% | 16%                      | 18% | 17% |
| Metamyelocytes                    | 3%                | 5%  | 5%  | 6%                       | 5%  | 6%  |
| Mature neutrophils                | 1%                | 1%  | 1%  | 1%                       | 3%  | 2%  |
| <b>Eosinophil lineage total:</b>  | 1%                | 5%  | 1%  | 3%                       | 4%  | 2%  |
| Myeloblasts                       | 0%                | 0%  | 0%  | 0%                       | 1%  | 0%  |
| Promyelocytes                     | 0%                | 1%  | 1%  | 1%                       | 2%  | 1%  |
| Myelocytes                        | 1%                | 4%  | 1%  | 3%                       | 2%  | 2%  |
| Metamyelocytes                    | 0%                | 1%  | 0%  | 0%                       | 0%  | 0%  |
| Cell type                         | Wild-type mouse # |     |     | IRF-8 transgenic mouse # |     |     |
|                                   | 1                 | 2   | 3   | 1                        | 2   | 3   |
| <b>Indeterminant myeloblasts:</b> | 6%                | 1%  | 2%  | 5%                       | 4%  | 4%  |
| <b>Erythroid lineage total:</b>   | 63%               | 51% | 31% | 41%                      | 44% | 45% |
| Erythroblast                      | 2%                | 4%  | 1%  | 4%                       | 2%  | 4%  |
| Proerythroblasts                  | 1%                | 2%  | 2%  | 2%                       | 3%  | 3%  |
| Basophilic erythroblasts          | 4%                | 2%  | 2%  | 1%                       | 5%  | 2%  |
| Polychromatic erythroblasts       | 3%                | 5%  | 3%  | 6%                       | 3%  | 5%  |
| Orthochromatic erythroblasts      | 7%                | 3%  | 5%  | 4%                       | 3%  | 3%  |
| Erythrocytes/reticulocytes:       | 46%               | 38% | 16% | 26%                      | 30% | 30% |
| <b>Lymphoid lineage total:</b>    | 17%               | 11% | 13% | 17%                      | 13% | 13% |
| Lymphoblasts                      | 0%                | 0%  | 0%  | 0%                       | 0%  | 0%  |
| Polymorphoblasts                  | 0%                | 0%  | 0%  | 0%                       | 0%  | 0%  |
| Lymphocytes                       | 17%               | 11% | 13% | 17%                      | 13% | 13% |
| <b>Plasma cell lineage total:</b> | 1%                | 1%  | 2%  | 1%                       | 2%  | 0%  |
| Plasmablasts                      | 0%                | 0%  | 0%  | 0%                       | 0%  | 0%  |
| Proplasma cells                   | 0%                | 0%  | 1%  | 1%                       | 1%  | 0%  |
| Plasmacells                       | 1%                | 1%  | 1%  | 1%                       | 1%  | 0%  |
| <b>Unidentified blast cells:</b>  | 1%                | 2%  | 4%  | 2%                       | 3%  | 2%  |

\* Analysis of bone marrow progenitors of the various lineages between WT and IRF-8-Tg transgenic under steady state-conditions (founder line 370; n=3 mice each). Morphological analysis was conducted in a blinded fashion.



Table V. Demographic and Clinical Characteristics of the Breast Cancer Patient Population

| <u>Patient Characteristics</u> |                      | <u>Number of Patients (n=30)</u> |
|--------------------------------|----------------------|----------------------------------|
| Age (years)                    | Median               | 59                               |
|                                | Average ( $\pm$ SEM) | $59.6 \pm 3.0$                   |
|                                | Range                | 39 – 86                          |
| Race                           | Caucasian            | 28                               |
|                                | African American     | 1                                |
|                                | Hispanic             | 1                                |
| Histology                      | Invasive ductal      | 23                               |
|                                | Invasive lobular     | 7                                |
| Stage                          | IIIA                 | 12                               |
|                                | IIIB                 | 3                                |
|                                | IIIC                 | 9                                |
|                                | IV                   | 6                                |
| Tumor Size (cm)                | < 2                  | 6                                |
|                                | 2-5                  | 11                               |
|                                | > 5                  | 11                               |
|                                | Not provided         | 2                                |
| Tumor grade                    | 1                    | 0                                |
|                                | 2                    | 2                                |
|                                | 3                    | 27                               |
|                                | Data not provided    | 1                                |
| Triple-negative                | Yes                  | 8                                |
|                                | No                   | 22                               |
| Non-triple-negative<br>(n=22)  | ER+/PR+/Her2+        | 1                                |
|                                | ER+/PR+/Her2-        | 13                               |
|                                | ER+/PR-/Her2+        | 1                                |
|                                | ER+/PR-/Her2-        | 2                                |
|                                | ER-/PR-/Her2+        | 5                                |
| Lymph nodes<br>Positive        | None                 | 4                                |
|                                | Data not provided    | 1                                |
|                                | Yes                  | 25                               |
|                                | Median               | 6                                |
|                                | Average ( $\pm$ SEM) | $7.4 \pm 1.3$                    |
| Range                          | 1 – 27               |                                  |
